# Supplementary material
Source: publisher figshare collection journal article supplement (https://frontiersin.figshare.com/ndownloader/files/33880430)
Supplement: Supplementary file [file 33880430]

## Supplementary Material

This PDF file includes:

Figures S1 to S5 and data availability statement

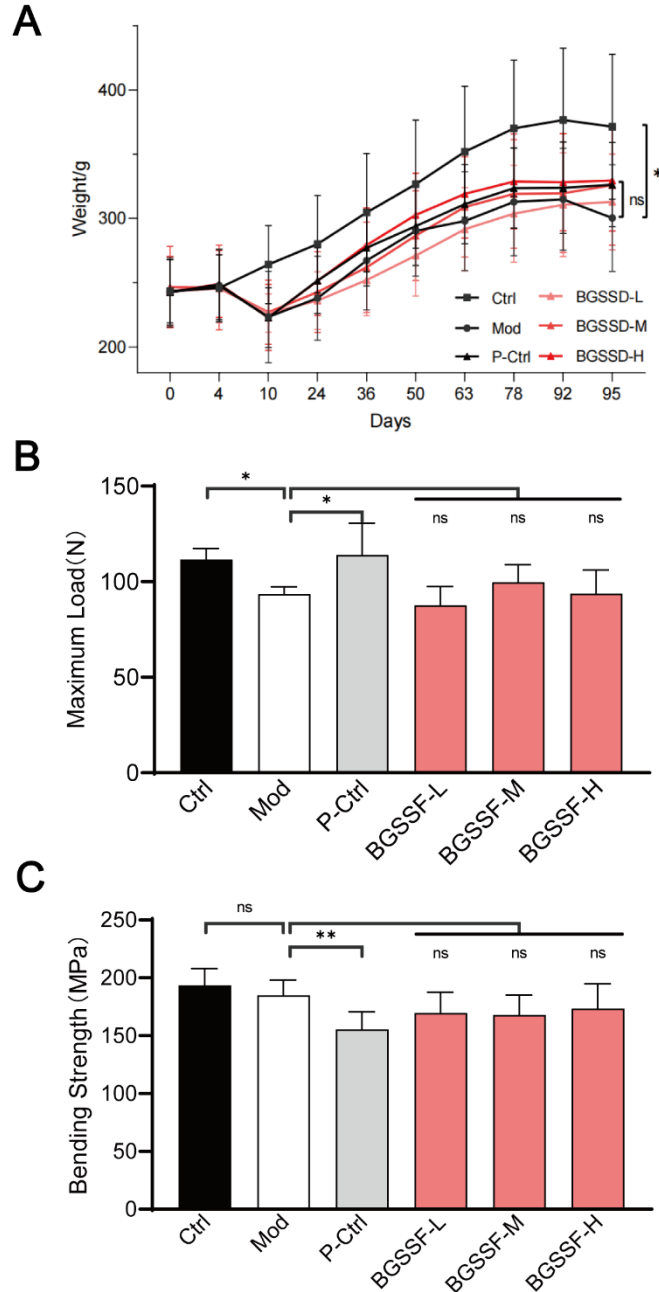

**Figure S1.** Effects of BGSSD on weight and bone biomechanics of ORX rats. **(A)** The weight of Ctrl was the highest, and there was no significant difference in drug-intervened groups compared with the Mod. **(B)** BGSSD had no significant effect on the maximum load of femurs. **(C)** There was no obvious effect on the bending strength. The results are presented as the mean  $\pm$  s.e.m., \* $P$ <0.05, \*\* $P$ <0.01, \*\*\* $P$ <0.001,  $n$ =6. NS, no significant.

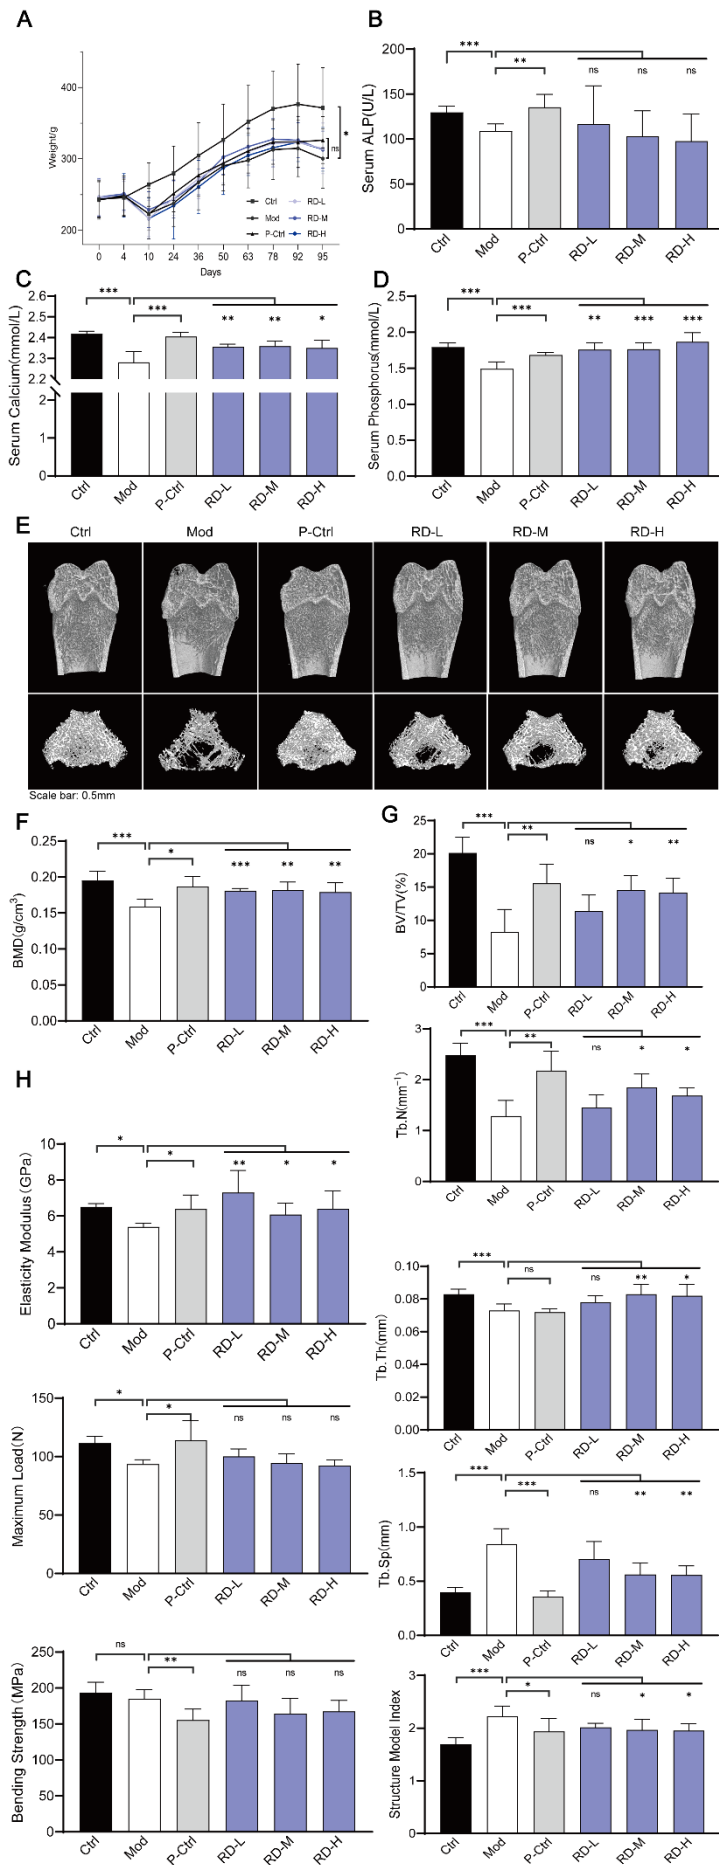

**Figure S2.** The effects of Rhizoma Drynariae on weight, bone metabolism indicators, bone mineral density, tissue morphology and biomechanics of femurs in ORX rats. **(A)** The weight of Ctrl was the highest, and there was no significant difference in drug-intervened groups compared with the Mod. **(B-D)** The functions of Rhizoma Drynariae on serum ALP, calcium and phosphorus. **(E)** Representative photomicrographs of distal femur sections by  $\mu$ -CT. **(F)** Quantitative analysis of BMD ( $\text{mg} \cdot \text{ccm}^{-1}$ ) of femurs. **(G)** Quantitative analysis of the ratio of bone volume to tissue volume (BV/TV, %), trabecular number (Tb.N,  $\text{mm}^{-1}$ ), trabecular thickness (Tb.Th,  $\text{mm}$ ), trabecular separation (Tb.Sp,  $\text{mm}$ ) and the structural model index (SMI) of the  $\mu$ -CT-scanned distal femurs. **(H)** Quantitative analysis of the biomechanics of femurs. The results are presented as the mean  $\pm$  s.e.m., \* $P < 0.05$ , \*\* $P < 0.01$ , \*\*\* $P < 0.001$ ,  $n = 6$ . NS, no significant.

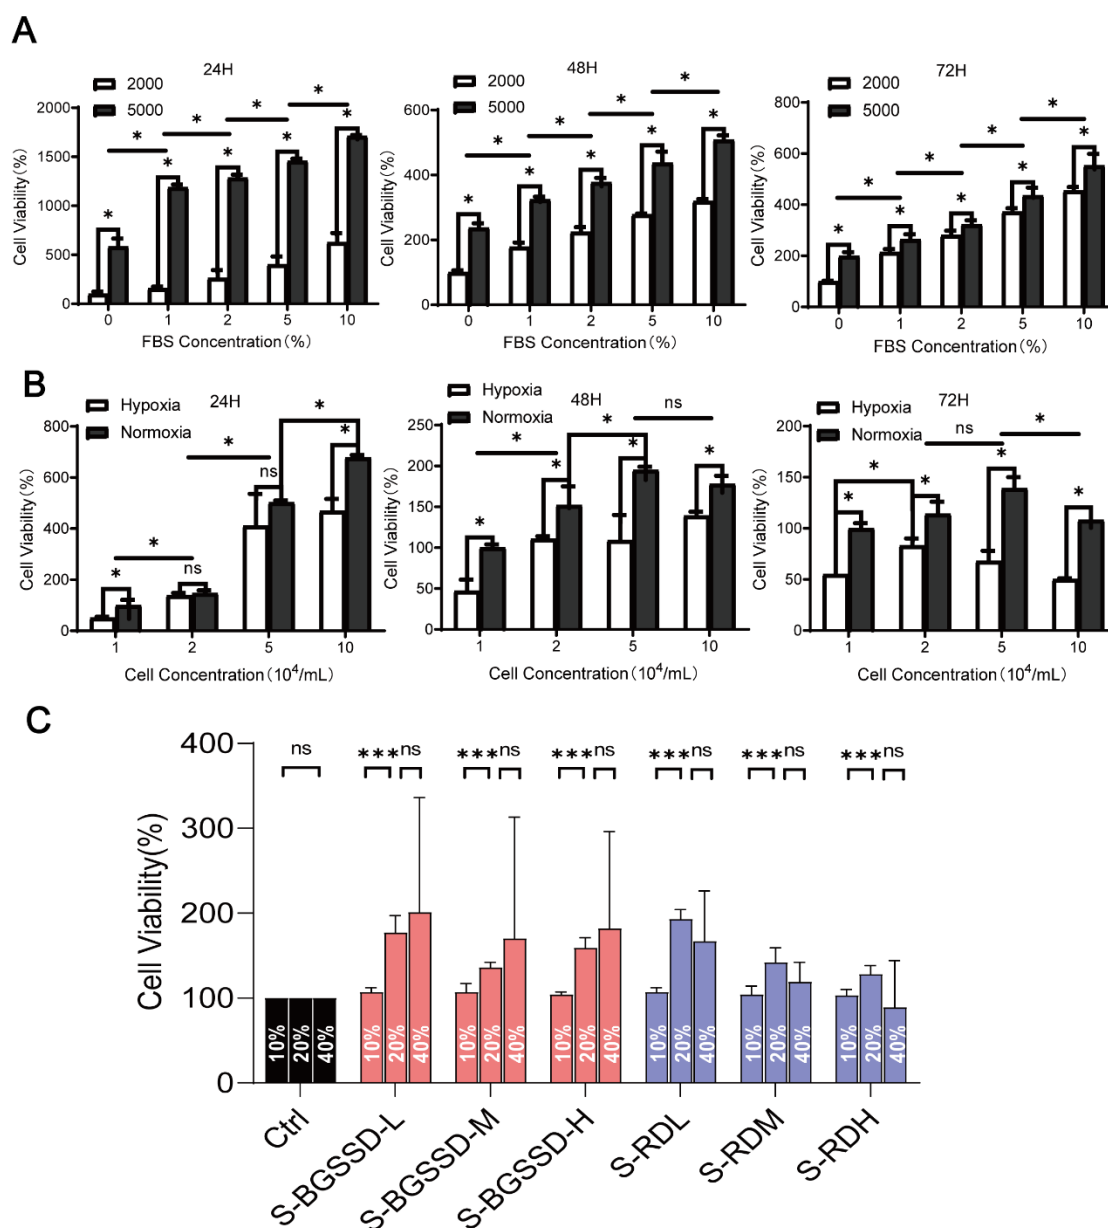

**Figure S3.** Results of MC3T3-E1 cells modeling and different concentrations of drug-containing serum intervening serum-starved MC3T3-E1 cells. **(A)** Cell viabilities of MC3T3-E1 cells under different concentrations of fetal bovine serum at different

intervened time. **(B)** Cell viabilities of MC3T3-E1 cells under different contents of oxygen at different intervened time. **(C)** The viability results of MC3T3-E1 cells intervened by different concentrations of drug-containing serum of BGSSD and Rhizoma Drynariae. The results are presented as the mean  $\pm$  s.e.m., \* $P$ <0.05, \*\* $P$ <0.01, \*\*\* $P$ <0.001. NS, no significant.

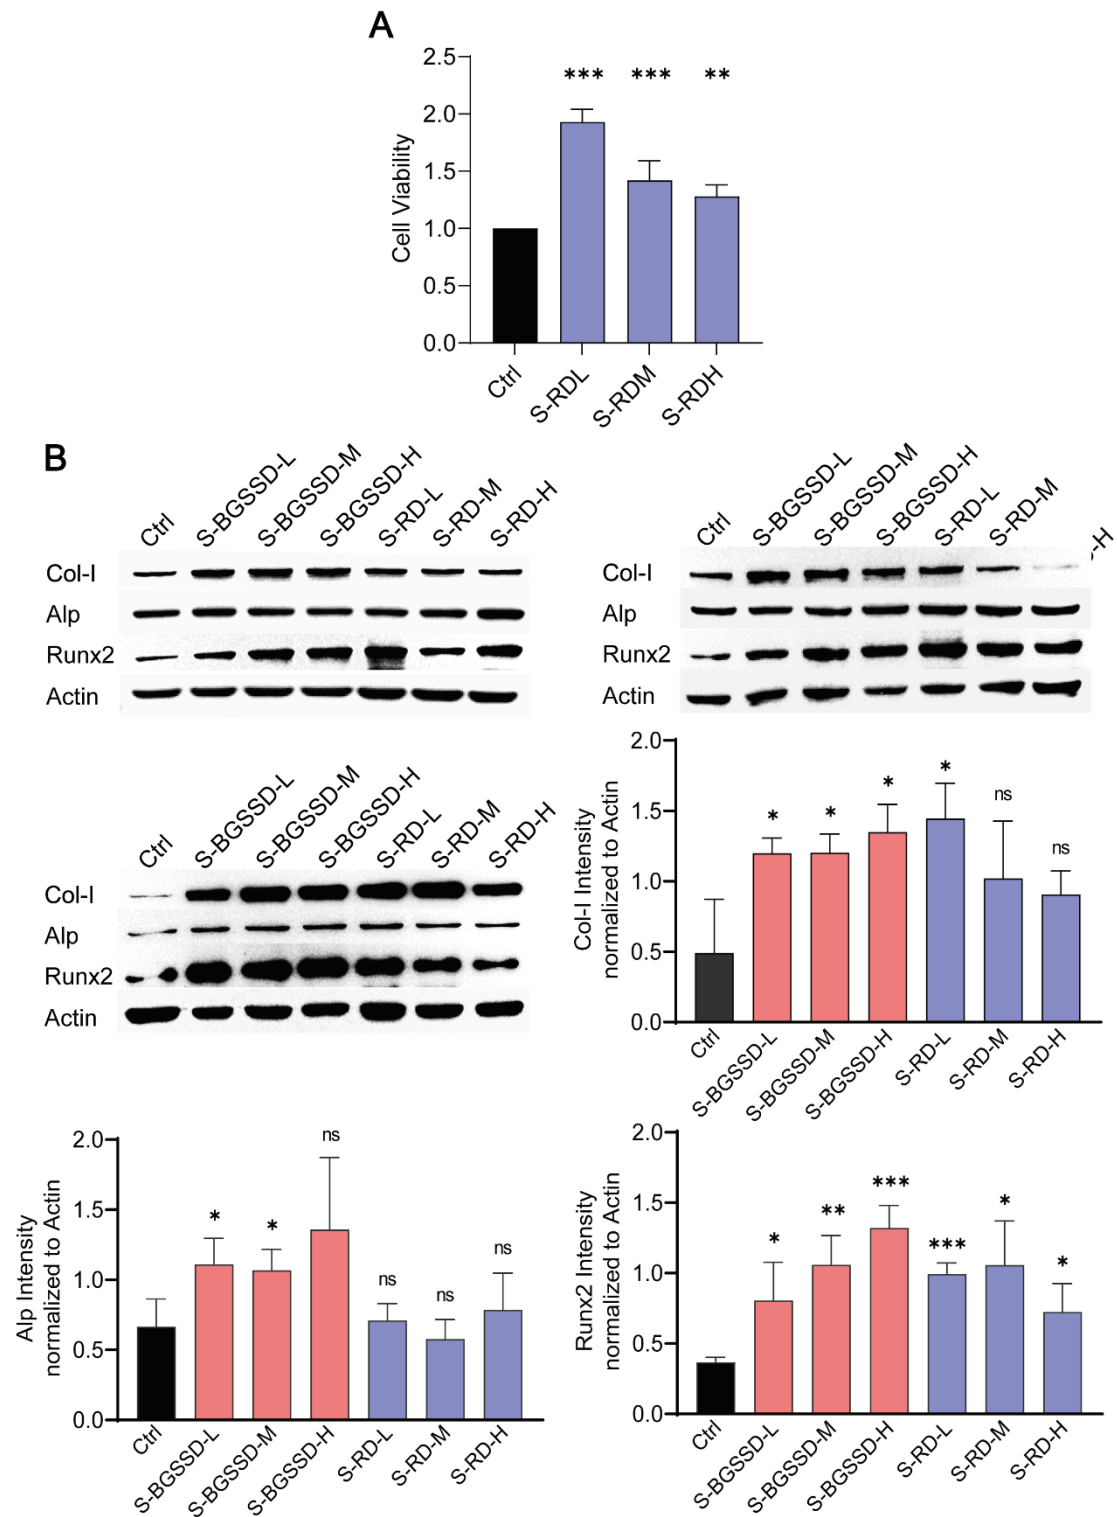

**Figure S4.** The results of drug-containing serum of Rhizoma Drynariae intervening in

the proliferation and differentiation of serum deprivation-induced MC3T3-E1 cells. **(A)** MTS assay analysis of the viability of MC3T3-E1 cells dealt with drug-containing serum of low, medium, and high-dose of Rhizoma Drynariae (in order to eliminate the influence of rat serum on cells, the Ctrl was treated with drug-free serum of rats). **(B)** Western blot and quantificational analysis of Col-I, ALP and Runx2 in MC3T3-E1 cells. Asterisks denote the comparison to serum-starved cells treated with rats' blank serum (Ctrl). The intervening time of drug-containing serum of Rhizoma Drynariae was 48 hours,  $\beta$ -actin served as the internal control in all western blots. Data are presented as the mean  $\pm$  s.e.m., \* $P$ <0.05, \*\* $P$ <0.01, \*\*\* $P$ <0.001,  $n$ =3. NS, no significant.

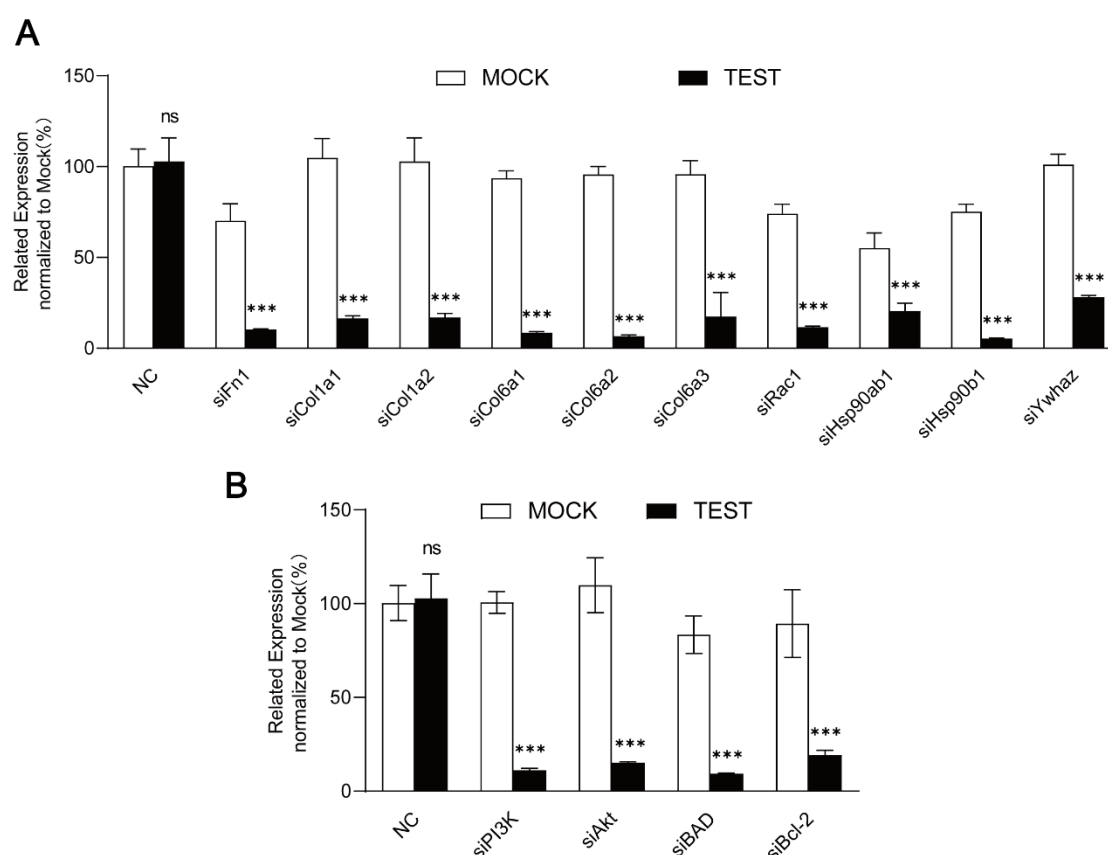

**Figure S5.** qRT-PCR assay to test the knock-down efficiency of targeting genes of PI3K-Akt pathway. **(A)** Each of the ten targeted genes (Fn1, Col1a1, Col1a2, Col6a1, Col6a2, Col6a3, Rac1, Hsp90ab1, Hsp90b1, and Ywhaz, except the Col6a3 and Ywhaz) was effectively knocked down by siRNA. **(B)** Each of the genes of PI3K-AKT and its downstream pathway, named PI3K, AKT, BAD, and Bcl-2, was effectively knocked down by siRNA. Data are presented as the mean  $\pm$  s.e.m., \* $P$ <0.05, \*\* $P$ <0.01, \*\*\* $P$ <0.001,  $n$ =4. NS, no significant.

**Data availability statement:** The datasets presented in this study can be found in online repositories, and the internal ID in PRIDE is “**PXD030275**”.
